# Supplementary material for: Life-stage specific transcriptomes of a migratory endoparasitic plant nematode, Radopholus similis elucidate a different parasitic and life strategy of plant parasitic nematodes
Source: PubMed Central journal article supplement (PMC6472380; doi:10.1038/s41598-019-42724-7), 2019-04-18
Supplement: 41598_2019_42724_MOESM1_ESM.pdf [file 41598_2019_42724_MOESM1_ESM.pdf]

**Life-stage specific transcriptomes of a migratory endoparasitic  
plant nematode, *Radopholus similis* elucidate a different  
parasitic and life strategy of plant parasitic nematodes**

Xin Huang, Chun-Ling Xu, Si-Hua Yang, Jun-Yi Li, Hong-Le Wang, Zi-Xu Zhang,  
Chun Chen, Hui Xie \*

Laboratory of Plant Nematology and Research Center of Nematodes of Plant  
Quarantine, Department of Plant Pathology Pathology/Guangdong Province Key  
Laboratory of Microbial Signals and Disease Control, Integrative Microbiology  
Research Centre, College of Agriculture, South China Agricultural University,  
Guangzhou, People's Republic of China.

\*correspondence and requests for materials should be addressed to H.X. (email:  
[xiehui@scau.edu.cn](mailto:xiehui@scau.edu.cn))

## **Supporting methods**

### **cDNA library construction, sequencing, data assembly**

After total RNA extraction and DNase I treatment, magnetic beads with Oligo (dT) were used to isolate mRNA from total RNA. The mRNAs mixed with fragmentation buffer were broken into short fragments at room temperature. Then, cDNAs were synthesized using the mRNA fragments as templates. Short fragments of cDNAs were purified, and single nucleotide A (adenine) was added. The cDNAs were then ligated with adapters, and suitable fragments were selected as templates for PCR amplification. Agilent 2100 Bioanalyzer (Agilent Technologies, Palo Alto, CA) and StepOnePlus Real-Time PCR System (Applied Biosystems) were used for the quantification and qualification of the sample libraries. These libraries were sequenced using an Illumina HiSeq™ 2000. In the bioinformatics analyses, adaptors and low-quality reads were removed. Then, transcripts were assembled with short reads using Trinity (release-20130225).

Table S1 Primers used in qPCR validation

| gene ID            | primers    |                        |
|--------------------|------------|------------------------|
| CL3020.Contig7     | qCL3020-7f | GGCATGTCCCTGTTCTGGAG   |
|                    | qCL3020-7r | GGGACGGGTTGTTTCAGGTAG  |
| Unigene5876_All    | q5876f     | CAGTTGTCGCCCTGCATCTA   |
|                    | q5876r     | AGAGGACGCAATGTACCACC   |
| Unigene3332_All    | q3332f     | CGGCTCCAGGTAGTTGAAGG   |
|                    | q3332r     | TGTGCAAGGGGATCTGTGTC   |
| CL4657.Contig2_All | QC4657-2F2 | GTTGGTCTCTGTCCGGTTCA   |
|                    | QC4657-2R2 | CTGGGCAGTGGGCTTCTT     |
| Unigene2137        | QU2137F    | AATGAACTGCTACGAAGA     |
|                    | QU2137R    | CCAGATGTCCGATAACTT     |
| CL4222.Contig3     | QC4222-3F  | CGTTGAGTTGAGAAGAGAGA   |
|                    | QC4222-3R  | ATGGCATCGGTAGCATTC     |
| Unigene3663        | QU3663F    | AGACCATTCAGGGCTTTG     |
|                    | QU3663R    | TGGTTGGAATTGGAGTTG     |
| CL2596.Contig2     | QC2596-2F  | TCAACTTCGTGAAGAACTAC   |
|                    | QC2596-2R  | GCTTAGCGAATGGTCAAA     |
| Unigene3259_All    | QU3259F    | AGACTGGTCCTTAGCAACA    |
|                    | QU3259R    | AAGAGTCGCCGTAGTTCA     |
| CL1549.Contig1_All | QC1549-1F  | CTCGGCGTTTGCGTTGTG     |
|                    | QC1549-1R  | CCGCTGGCAGTGTCCCTC     |
| Unigene10757_All   | q10757f    | AATGAATCCCCACTCGCTGTT  |
|                    | q10757r    | CTGTTGCTCGCAGTTTCTT    |
| CL733.Contig2_All  | QC733-2F   | AAGCAAAGAACCACCTGA     |
|                    | QC733-2R   | CGGCAGTAGTTCCCAAT      |
| CL4263.Contig2_All | qCL4263-2f | CTACGTGATCGTGGACTGGC   |
|                    | qCL4263-2r | GTACAGGATGTGCGGGTAGG   |
| CL921.Contig3      | QC921-3F2  | CTAATGCTTCTTGTGTCTTCT  |
|                    | QC921-3R2  | CTTCCTGACTTGAGTTATGATT |

|                  |          |                          |
|------------------|----------|--------------------------|
| Unigene7051_All  | QU7051R  | TTACTGCTCACTCAATGC       |
|                  | QU7051R  | TCAATCGGTCGTAGAACT       |
| Unigene2443_All  | QU2443F  | GAGCATCGGAAACACAAA       |
|                  | QU2443R  | GTTCAACAGTTGGTCAGT       |
| Unigene215_All   | QU215F   | GGTCGTGGACGCCTTCTTG      |
|                  | QU215R   | TGGCTGTTTTGTGCCTTTGC     |
| Unigene17031_All | QU17031F | TCACCGCCACCAACTTCTGC     |
|                  | QU17031R | TCCTTGACATTGCTTGCCATCC   |
| Unigene4694_All  | QU4694F  | TGAATGTTAGAAACCCAATCAAAG |
|                  | QU4694R  | CACTACGACACATTGAACCCCA   |
| Actin            | Actin-f  | GAAAGAGGGCCGGAAGAG       |
|                  | Actin-r  | AGATCGTCCGCGACATAAAG     |

Table S2 Evaluation of assembly quality of four life stages of *Radopholus similis* transcriptome sequencing.

| Sample   | Total<br>Number | Mean<br>Length(nt) | N50  | Distinct<br>Clusters | Distinct<br>Singletons |
|----------|-----------------|--------------------|------|----------------------|------------------------|
| egg      | 51,981          | 1792               | 2999 | 31,388               | 20,593                 |
| male     | 39,599          | 1537               | 2497 | 21,710               | 17,889                 |
| Juvenile | 55,176          | 1612               | 2738 | 31,544               | 23,632                 |
| female   | 45,129          | 1467               | 2563 | 23,109               | 22,020                 |
| All      | 64,761          | 1994               | 3136 | 42,389               | 22,372                 |

Table S3 Functional annotation for *Radopholus similis* transcriptome against NR, NT, Swiss-Prot, KEGG, COG and GO database.

| Sequence File Name | NR     | NT     | Swiss-Prot | KEGG   | COG    | GO     | ALL    |
|--------------------|--------|--------|------------|--------|--------|--------|--------|
| R.similis.fa       | 47,595 | 13,296 | 43,010     | 39,448 | 25,017 | 30,444 | 48,432 |

Table S9 Stability analysis of actin in different life stages of *Radopholus similis*.

|                                               | GJ- egg | GJ- juvenile | GJ-female | GJ-male |
|-----------------------------------------------|---------|--------------|-----------|---------|
| Average Ct-1*                                 | 27.9274 | 28.15754     | 27.6127   | 28.0742 |
| Average Ct-2*                                 | 22.2646 | 23.0781      | 22.7527   | 22.9543 |
| Average Ct-3*                                 | 21.0669 | 21.3497      | 21.1092   | 21.2655 |
| Average Ct values of<br>the three experiments | 23.7529 | 24.1951      | 23.8249   | 24.0980 |
| SD of average Ct                              |         |              |           | 0.1838  |
| C.V (%)                                       |         |              |           | 0.7671  |

\* 1, 2, 3: represents three independent experiments.

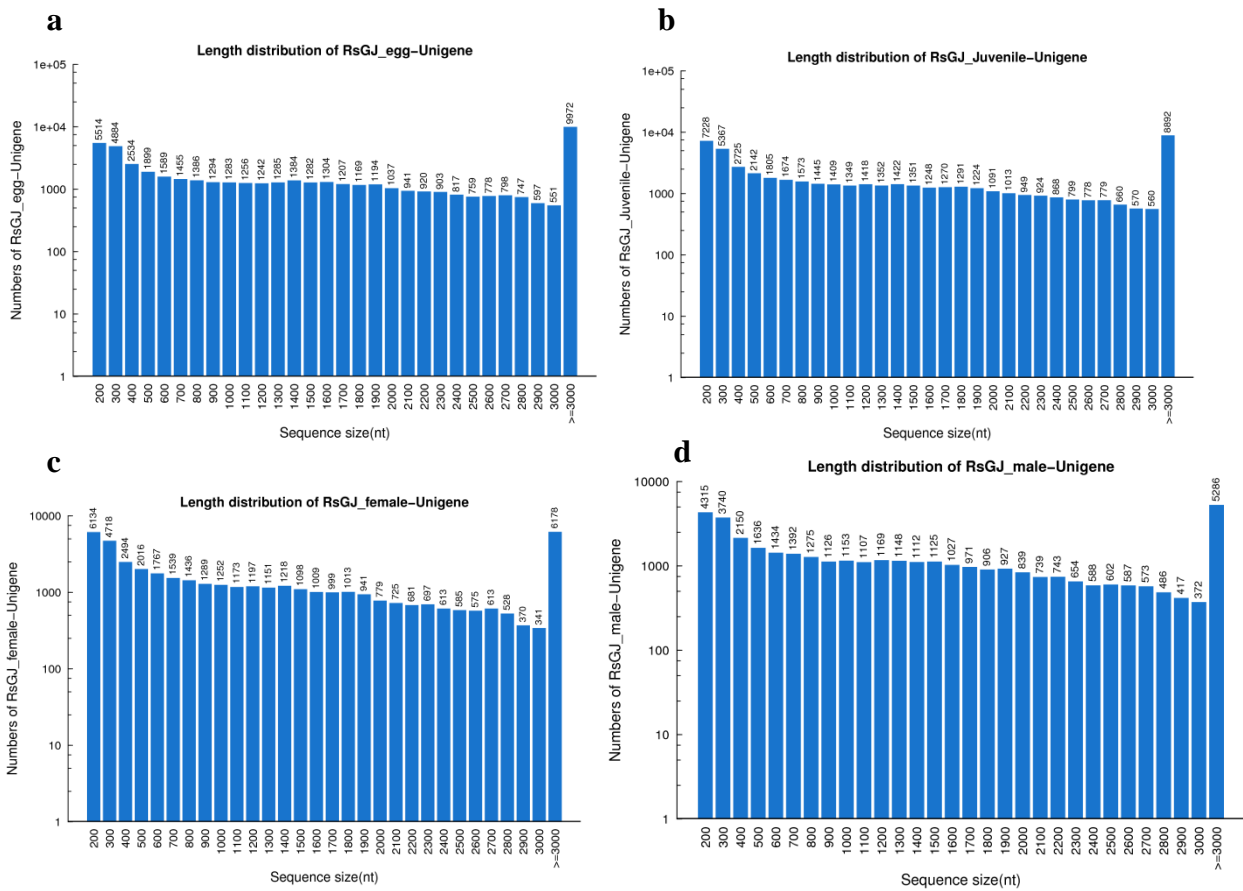

Figure S1 Length distribution of the *Radopholus similis* transcriptome

- (a) Unigene length distribution of *R. similis* eggs. (b) Unigene length distribution of *R. similis* juveniles. (c) Unigene length distribution of *R. similis* female. (d) Unigene length distribution of *R. similis* male.

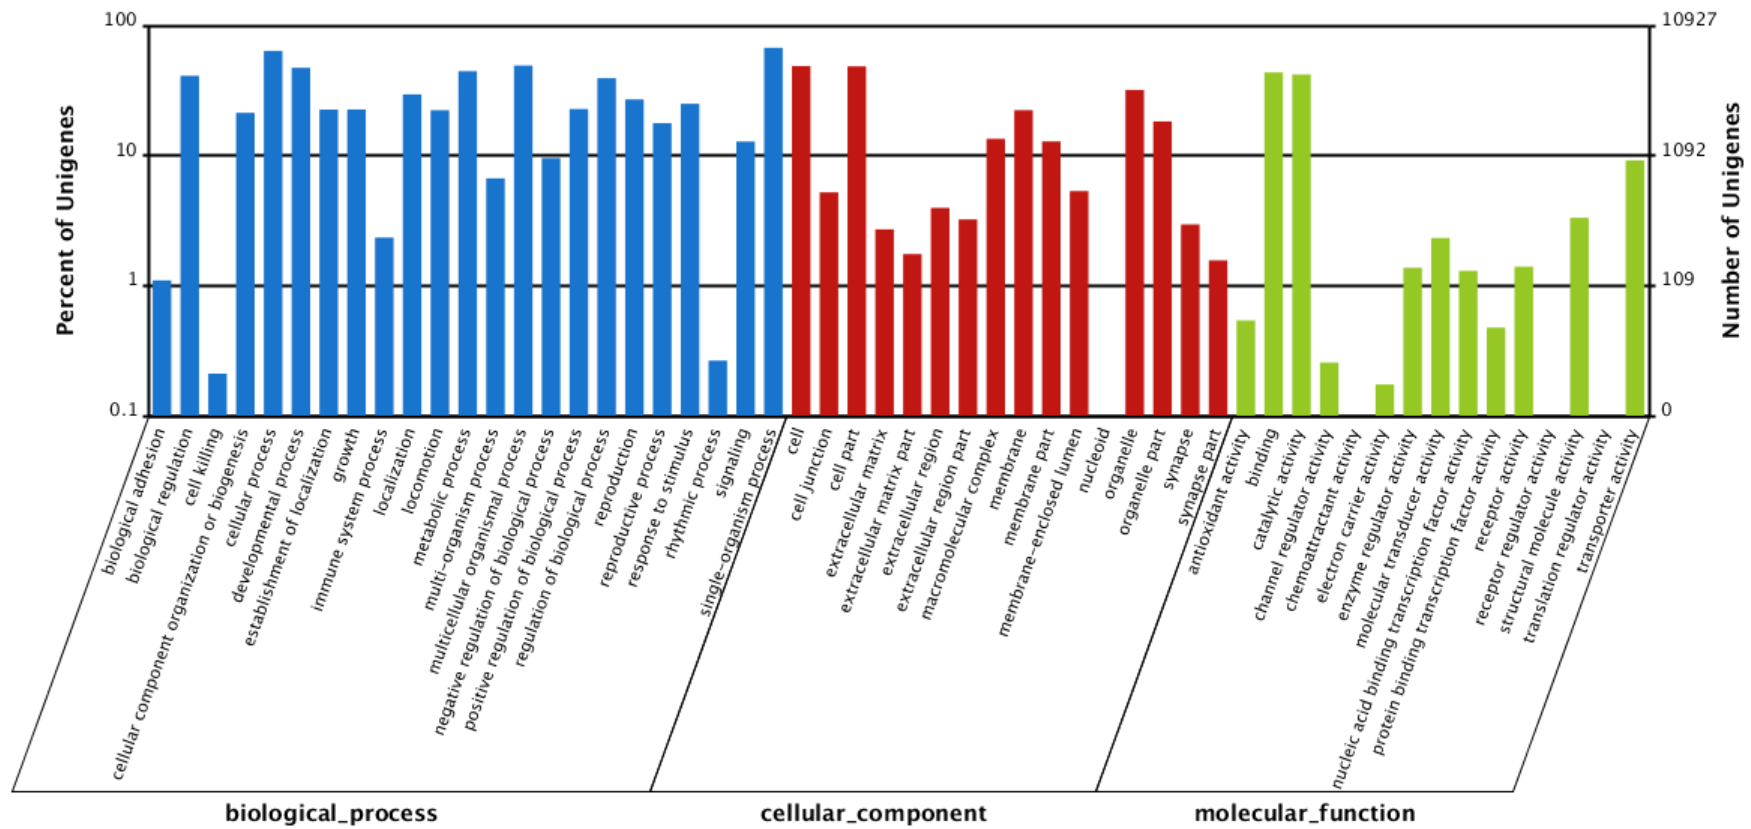

Figure S2 GO classification of differentially expressed genes between eggs and juveniles of *Radopholus similis*. GO functions are shown on the X-axis. The right side of the Y-axis shows the number of genes with the GO function, and the left side shows the percentage.

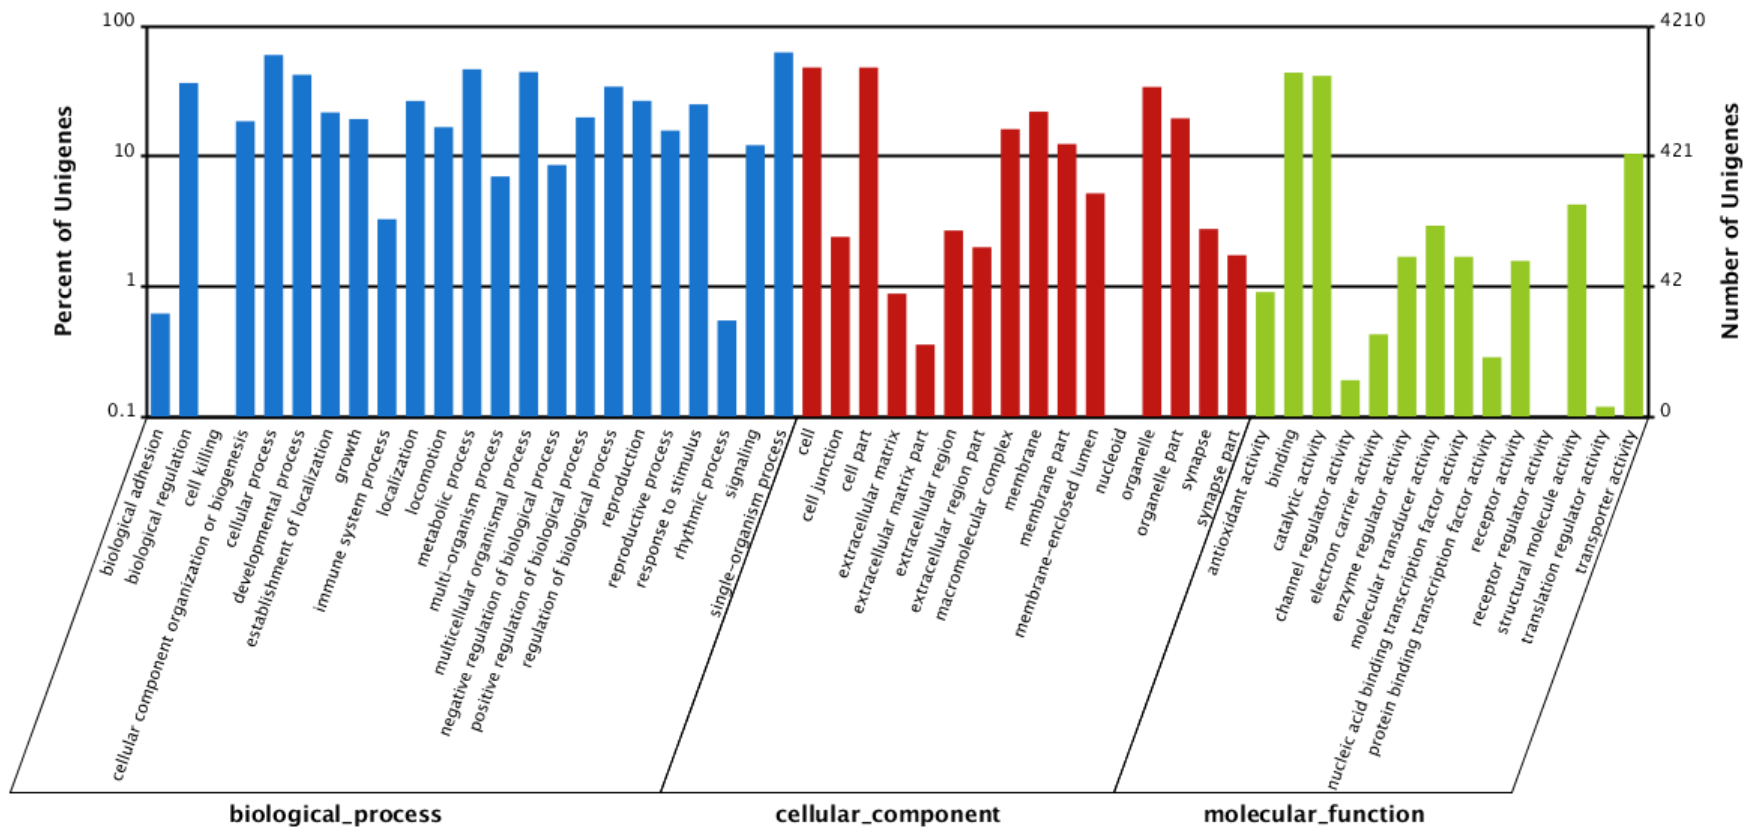

Figure S3 GO classification of differentially expressed genes between juveniles and females of *Radopholus similis*. GO functions are shown on the X-axis. The right side of the Y-axis shows the number of genes with the GO function, and the left side shows the percentage.



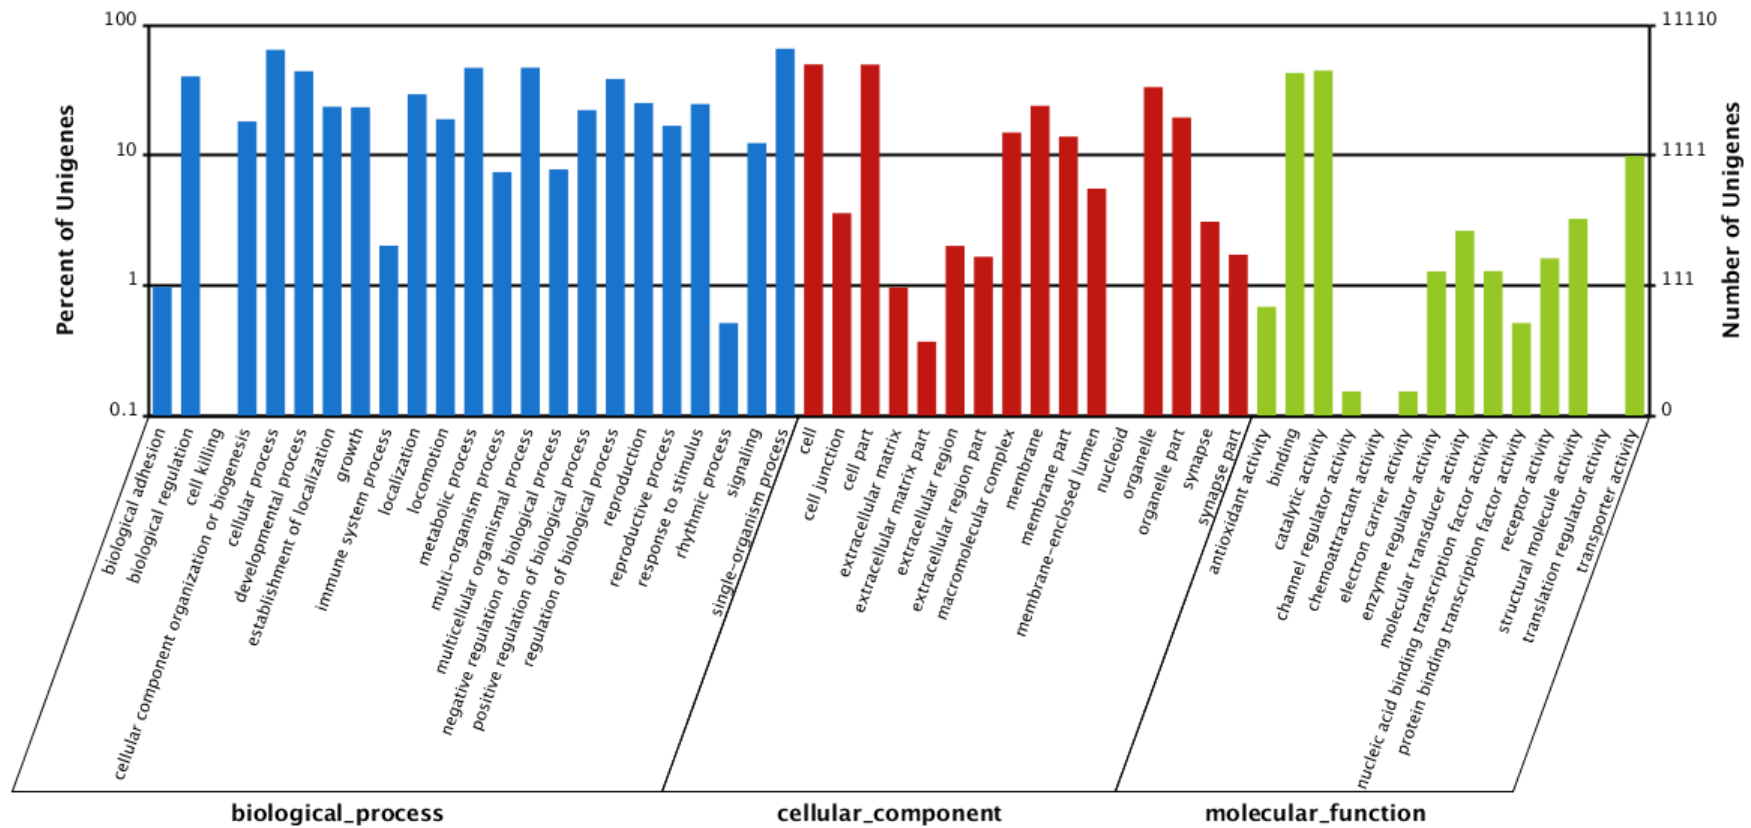

Figure S4 GO classification of differentially expressed genes between juveniles and males of *Radopholus similis*.

GO functions are shown on the X-axis. The right side of the Y-axis shows the number of genes with the GO function, and the left side shows the percentage

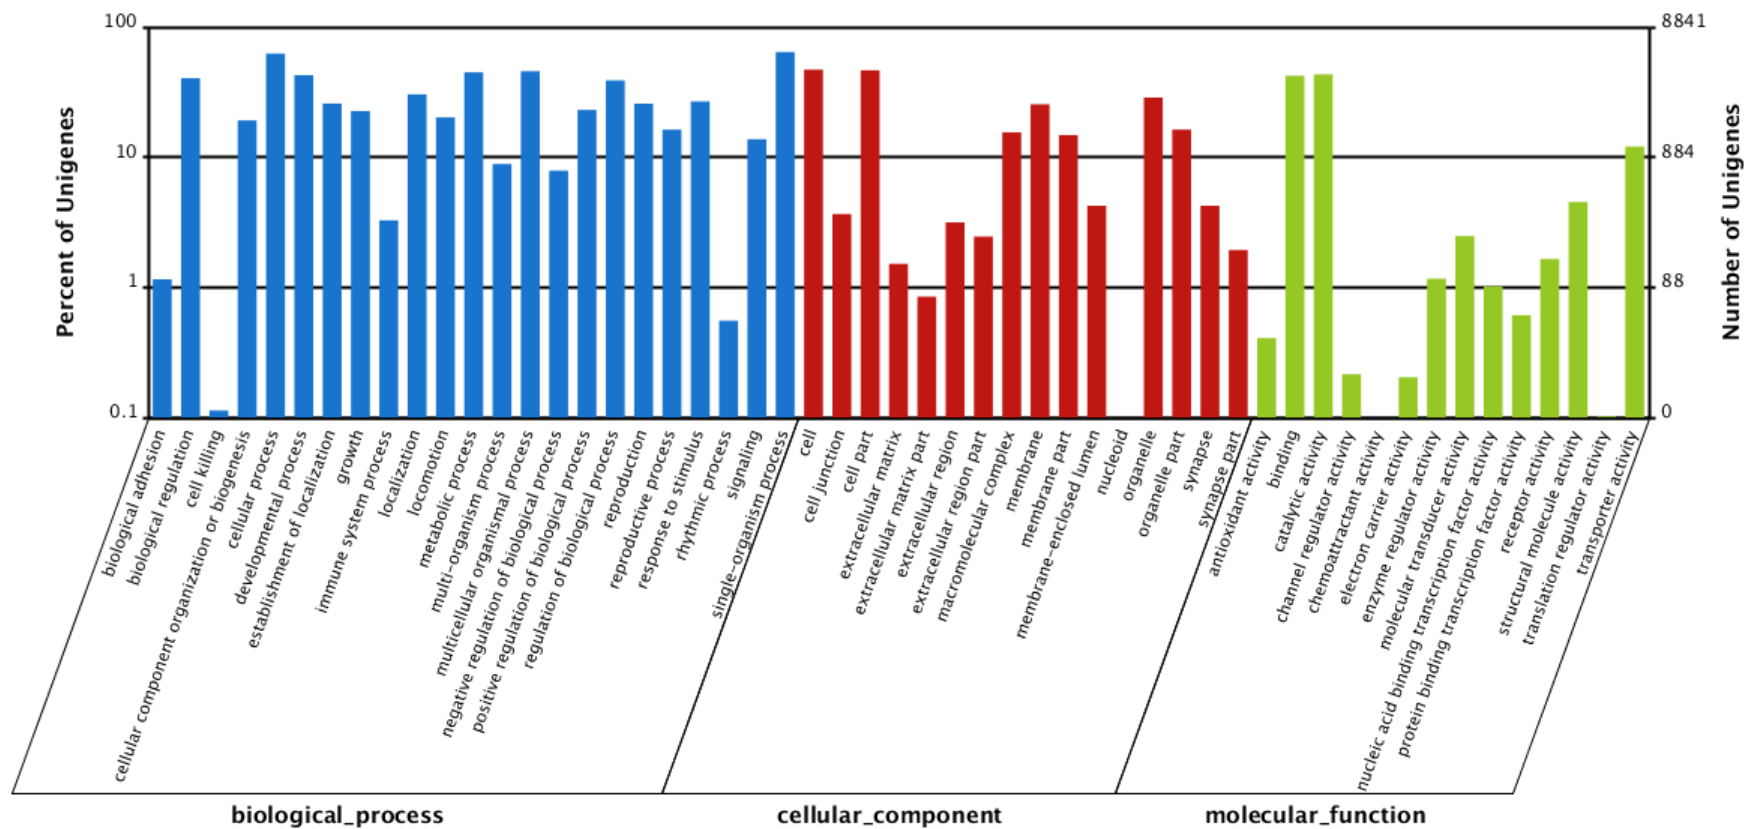

Figure S5 GO classification of differentially expressed genes between males and females of *Radopholus similis*.

GO functions are shown on the X-axis. The right side of the Y-axis shows the number of genes with the GO function, and the left side shows the percentage

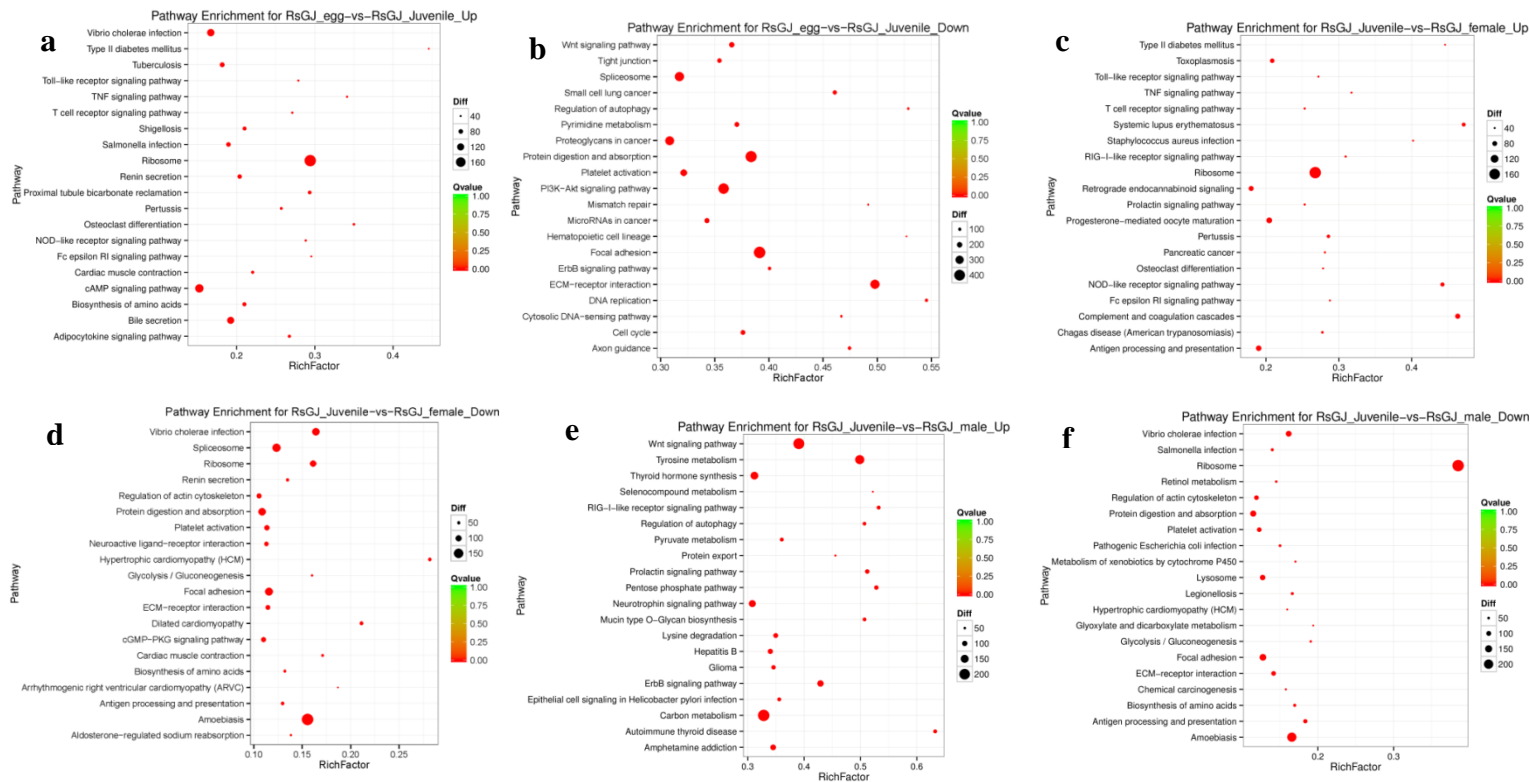

Figure S6 KEGG pathway enrichment of differentially expressed genes in *Radopholus similis*

(a) KEGG enrichment of up-regulated genes in juveniles compared with eggs. (b) KEGG enrichment of down-regulated genes in juveniles compared with eggs. (c) KEGG enrichment of up-regulated genes in females compared with juveniles. (d) KEGG enrichment of down-regulated genes in females compared with juveniles. (e) KEGG enrichment of up-regulated genes in males compared with juveniles. (F) KEGG enrichment of down-regulated genes in males compared with juveniles. X-axis: Rich factors of enriched KEGG pathway. Y-axis: Pathways annotated in the *R. similis* transcriptome. The color change from green to red signifies the change of q value from 1 to 0. Diff means the number of differentially expressed genes.

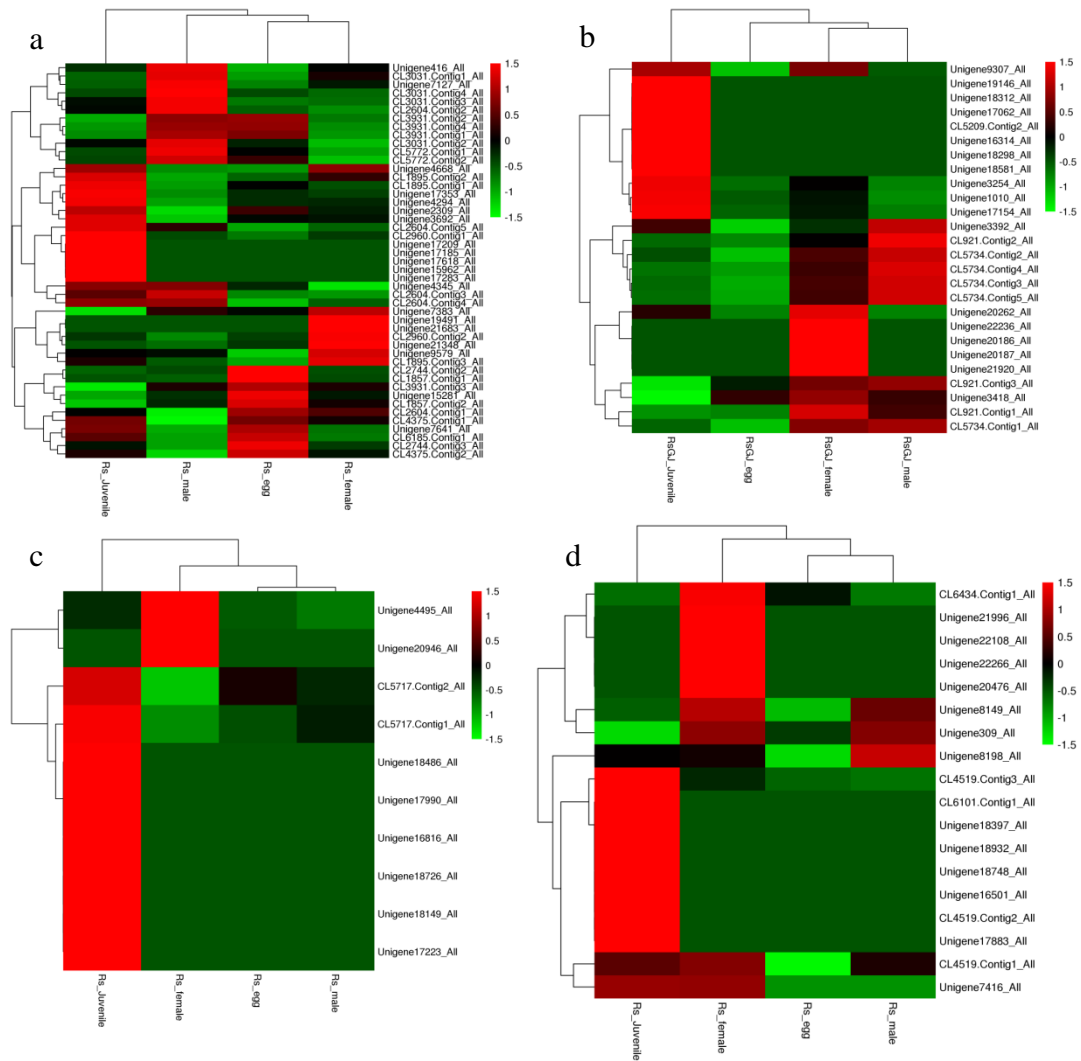

Figure S7 Heatmap of putative antioxidant genes (FDR<10-5) expression in *Radopholus similis*.

(a) Heatmap of putative GST. (b) Heatmap of putative SOD. (c) Heatmap of putative peroxiredoxin. (d) Heatmap of putative glutathione peroxidase. Expression level for each gene was presented by normalized FPKM value. Red signifies an increase in expression and green, a decrease in expression. Heatmap scale bars indicate log<sub>2</sub>-fold changes.
